# Supplementary material
Source: Springer Nature journal article supplement (https://www.springermedizin.de/resource/supplementary/12955_2010_726_MOESM2_ESM.pdf/9560858)

□ pre-ICU

■ after 3 months

▨ after 6 months

Percentages

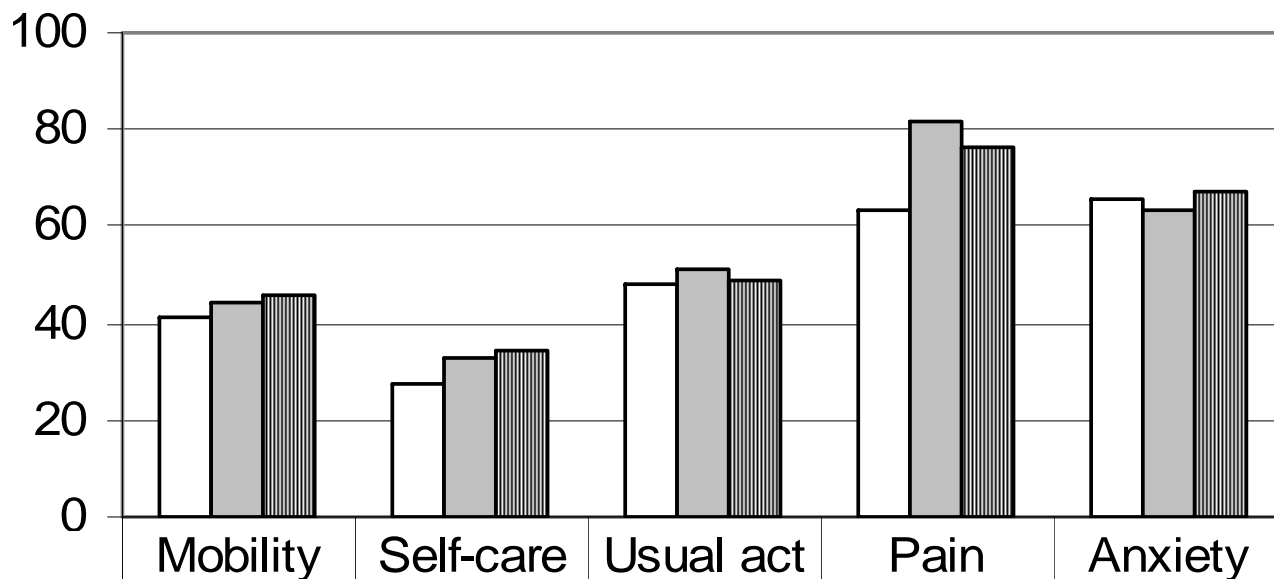

□ pre-ICU

41

27

48

64

66

■ after 3 months

44

33

51

82

64

▨ after 6 months

45

34

49

76

67

Supplement: MOESM2 [file 9560858]
